# Supplementary material for: Impaired Expression of Cytoplasmic Actins Leads to Chromosomal Instability of MDA-MB-231 Basal-Like Mammary Gland Cancer Cell Line
Source: MDPI journal article supplement (doi:10.3390/molecules26082151), 2021-04-08
Supplement: s1 [file s1]

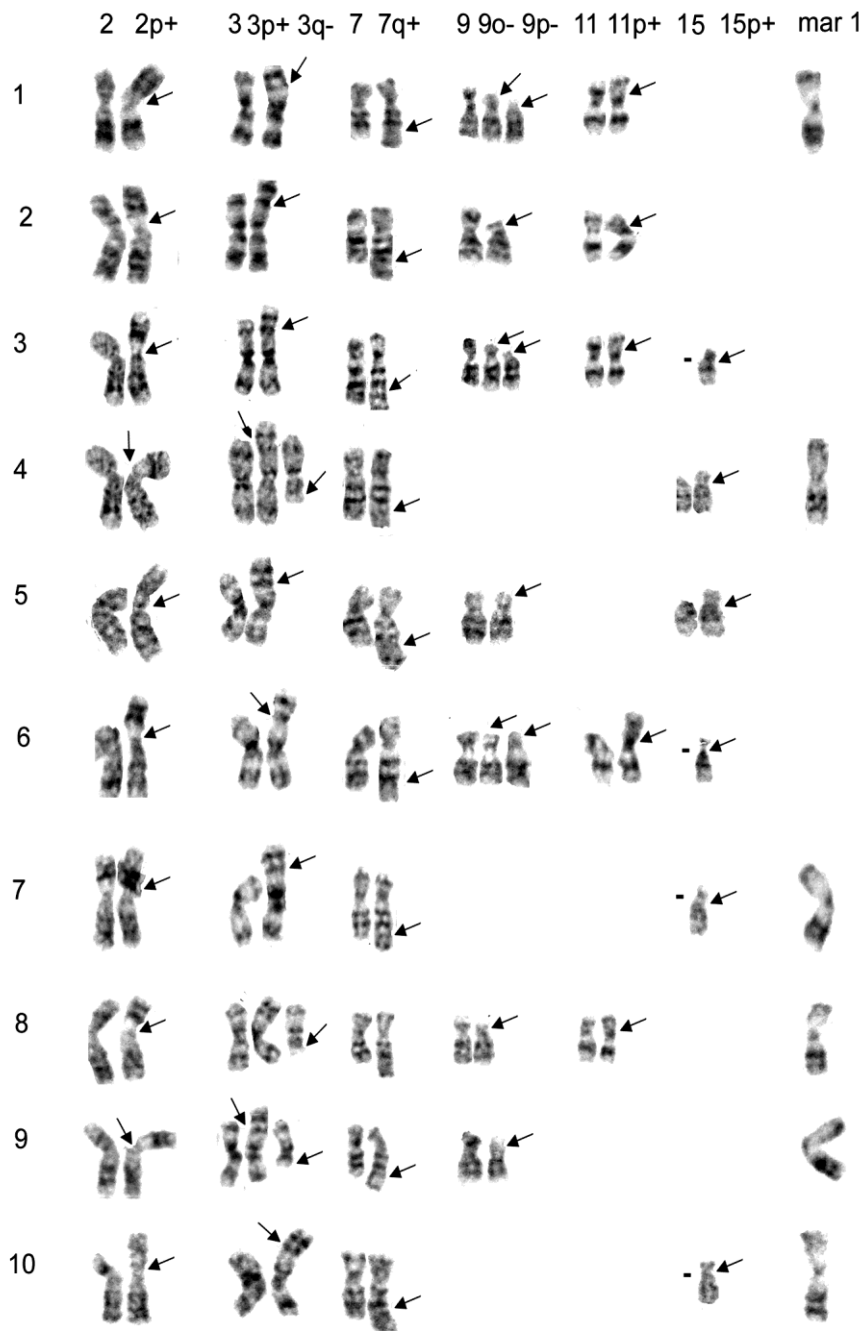

**Figure S1. Karyotypic analysis of MDA-MB-231 cell line.**

Clonal chromosome markers and its normal homologs from ten karyotyped cells of MDA-MB-231 cell line. Arrows point to main chromosomal alterations. Giemsa staining (G-banding).

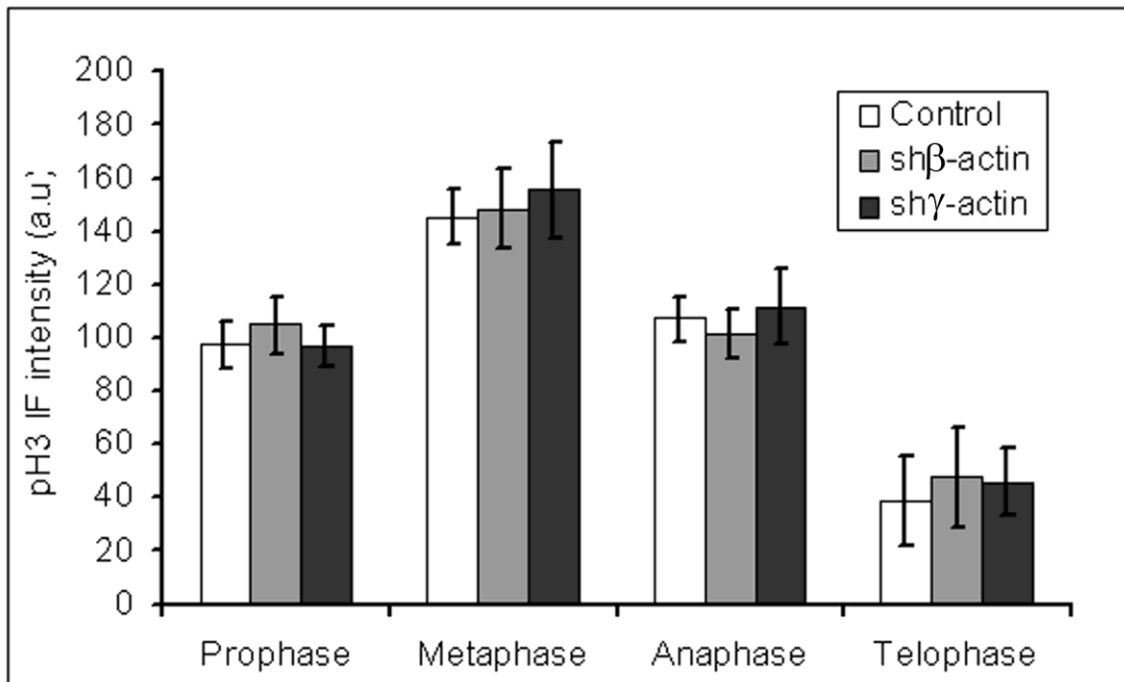

**Figure S2. Immunofluorescence (IF) intensity of pH3 histone in mitotic MDA-MB-231 control cells and with down-regulated  $\beta$ - or  $\gamma$ -actin.**

Graph represents the quantification of IF- pH3 intensity of chromosome area in MDA-MB-231 cells with down-regulated  $\beta$ - or  $\gamma$ -actin (Mean  $\pm$  SEM, n=15 for each phase and condition of actin expression) at the different mitotic phases.
